# Supplementary figures and images for: Correlating supercritical fluid extraction parameters with volatile compounds from Finnish wild mushrooms (Craterellus tubaeformis) and yield prediction by partial least squares regression analysis
Source: Royal Society of Chemistry journal article supplement (doi:10.1039/c7ra12472d), 2018-01-01

Supplementary figure S1:

Ion chromatogram of extracts obtained under 85 bar, 50 °C, 70 mL SC-CO<sub>2</sub>

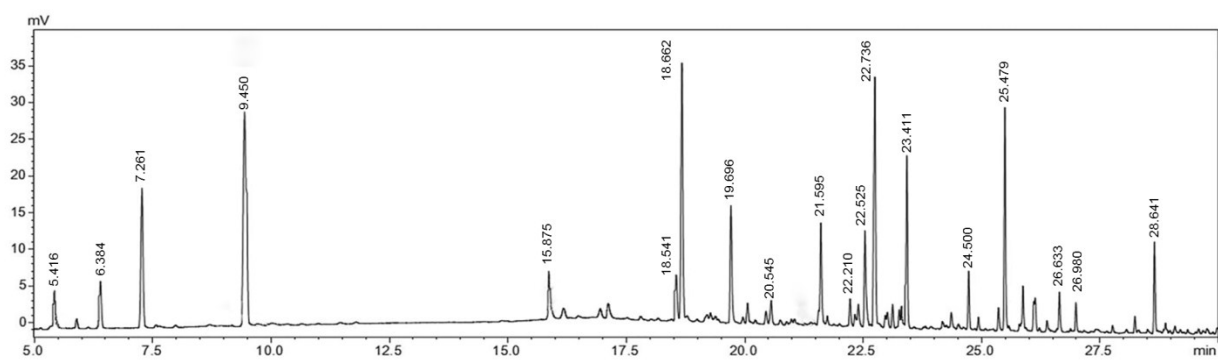

Supplement: c7ra12472d1.pdf [file c7ra12472d1.pdf]
